# Supplementary material for: Computational study of the rovibrational spectrum of CO2–N2
Source: Royal Society of Chemistry journal article supplement (doi:10.1039/d0cp04186f), 2020-01-01
Supplement: d0cp04186f1.pdf [file d0cp04186f1.pdf]

## Supporting Information to:

# *“Computational Study of the Rovibrational Spectrum of $CO_2-N_2$ ”*

Ernesto Quintas-Sánchez,<sup>\*,†</sup> Richard Dawes,<sup>\*,†</sup> Xiao-Gang Wang,<sup>\*,‡</sup> and Tucker  
Carrington Jr.<sup>\*,‡</sup>

<sup>†</sup>*Department of Chemistry, Missouri University of Science & Technology, Rolla, MO  
65401, USA*

<sup>‡</sup>*Chemistry Department, Queen’s University, Kingston, Ontario K7L 3N6, Canada.*

E-mail: quintassancheze@mst.edu; dawesr@mst.edu; xgwang.dalian@gmail.com;

tucker.carrington@queensu.ca

Table 1: Energies (in  $\text{cm}^{-1}$ ) for up to 40 of the levels below  $-100 \text{ cm}^{-1}$  in each symmetry block are listed. The two left-most columns of energies are allowed states, while the two columns at right are not, but transitions involving ro-vibrational states, whose vibrational parents do not exist, are allowed (see text)

| $J = 0$ |                |                |                 |                 |
|---------|----------------|----------------|-----------------|-----------------|
|         | ee+ ( $A'_1$ ) | eo+ ( $B'_2$ ) | oo+ ( $A''_1$ ) | oe+ ( $B''_2$ ) |
| 1       | -229.461785    | -229.461694    | -208.389856     | -208.389684     |
| 2       | -188.143860    | -188.142633    | -170.003710     | -170.004844     |
| 3       | -182.956401    | -182.954205    | -167.797040     | -167.791340     |
| 4       | -166.189699    | -166.087631    | -157.139551     | -157.142946     |
| 5       | -154.322518    | -154.320047    | -145.621185     | -145.643643     |
| 6       | -149.123532    | -149.104719    | -140.433898     | -140.438351     |
| 7       | -141.799808    | -141.795755    | -132.091644     | -132.106833     |
| 8       | -136.403382    | -136.381940    | -130.736170     | -130.673650     |
| 9       | -129.373529    | -129.102639    | -121.743125     | -122.209268     |
| 10      | -128.928716    | -127.107087    | -117.894991     | -118.622659     |
| 11      | -127.168103    | -126.612974    | -115.537318     | -116.518828     |
| 12      | -119.562328    | -119.148106    | -114.292595     | -115.636215     |
| 13      | -118.904804    | -116.662367    | -111.830901     | -114.512378     |
| 14      | -117.352416    | -113.312336    | -110.869966     | -110.722385     |
| 15      | -114.484747    | -112.625381    | -106.608916     | -107.790649     |
| 16      | -111.926656    | -108.856674    | -103.638777     | -106.276439     |
| 17      | -108.398776    | -106.179157    | -101.470602     | -105.929361     |
| 18      | -105.394927    | -104.007705    |                 | -101.716283     |
| 19      | -103.982217    | -102.020896    |                 |                 |
| 20      | -101.603280    |                |                 |                 |
|         | ee- ( $A'_2$ ) | eo- ( $B'_1$ ) | oo- ( $A''_2$ ) | oe- ( $B''_1$ ) |
| 1       | -175.694427    | -175.693283    | -196.557007     | -196.552601     |
| 2       | -140.311571    | -140.337268    | -156.137235     | -156.099396     |
| 3       | -137.134802    | -137.071128    | -153.246052     | -153.141233     |
| 4       | -128.506275    | -128.703868    | -139.588177     | -138.429367     |
| 5       | -118.422587    | -118.945604    | -126.246523     | -126.090433     |
| 6       | -114.845160    | -115.578369    | -119.433428     | -119.019890     |
| 7       | -104.904931    | -109.530918    | -113.832763     | -113.615169     |
| 8       | -103.948465    | -105.539339    | -112.316724     | -108.875794     |
| 9       | -101.298511    | -102.036071    | -111.316295     | -106.718126     |
| 10      |                |                | -107.927598     | -102.281922     |
| 11      |                |                | -105.241997     | -100.391514     |
| 12      |                |                | -103.359891     |                 |

Table 2: Energies (in  $\text{cm}^{-1}$ ) for up to 40 of the levels below  $-100 \text{ cm}^{-1}$  in each symmetry block are listed. The two left-most columns of energies are allowed states, while the two columns at right are not, but transitions involving ro-vibrational states, whose vibrational parents do not exist, are allowed (see text)

| $J = 1$ |                |                |                 |                 |
|---------|----------------|----------------|-----------------|-----------------|
|         | ee+ ( $A_1'$ ) | eo+ ( $B_2'$ ) | oo+ ( $A_1''$ ) | oe+ ( $B_2''$ ) |
| 1       | -207.934905    | -207.935086    | -228.996585     | -228.996675     |
| 2       | -196.086455    | -196.090848    | -196.428367     | -196.423989     |
| 3       | -175.565849    | -175.564721    | -187.689544     | -187.690740     |
| 4       | -169.531940    | -169.530889    | -182.489911     | -182.492103     |
| 5       | -167.328854    | -167.334660    | -175.256308     | -175.258122     |
| 6       | -156.716575    | -156.713429    | -165.587472     | -165.688268     |
| 7       | -155.658737    | -155.694958    | -156.009970     | -155.972531     |
| 8       | -152.652796    | -152.756876    | -153.834500     | -153.836471     |
| 9       | -145.220973    | -145.227228    | -153.118914     | -153.015032     |
| 10      | -140.211048    | -140.235168    | -148.645665     | -148.664088     |
| 11      | -139.901707    | -139.901275    | -141.336017     | -141.339934     |
| 12      | -137.887273    | -139.017677    | -139.870192     | -139.845456     |
| 13      | -137.005781    | -136.943023    | -139.452065     | -138.302869     |
| 14      | -131.620550    | -131.607219    | -136.624013     | -136.701646     |
| 15      | -130.205446    | -130.268938    | -135.939900     | -135.957115     |
| 16      | -128.380766    | -128.577302    | -128.604842     | -128.880106     |
| 17      | -125.627113    | -125.758469    | -128.318229     | -128.587031     |
| 18      | -121.260042    | -121.246568    | -126.672833     | -127.913557     |
| 19      | -118.613985    | -118.983765    | -126.120185     | -126.599949     |
| 20      | -118.290319    | -118.812347    | -126.010000     | -125.944224     |
| 21      | -117.575262    | -117.673777    | -119.306815     | -118.961539     |
| 22      | -115.244501    | -115.479305    | -118.797960     | -118.787932     |
| 23      | -114.731484    | -115.185377    | -118.418326     | -118.617327     |
| 24      | -114.062404    | -115.100847    | -117.388313     | -116.454653     |
| 25      | -113.106045    | -113.781636    | -114.760601     | -116.074036     |
| 26      | -111.980357    | -113.286062    | -113.711762     | -114.426976     |
| 27      | -110.203567    | -112.167135    | -113.691780     | -113.495128     |
| 28      | -108.769865    | -110.216624    | -112.443426     | -113.005179     |
| 29      | -107.216721    | -109.549580    | -111.848368     | -108.817029     |
| 30      | -106.235112    | -108.551148    | -111.215288     | -108.707197     |
| 31      | -105.476256    | -107.397896    | -111.166848     | -106.759403     |
| 32      | -104.780949    | -107.065653    | -107.803047     | -106.499676     |
| 33      | -103.886509    | -105.544383    | -107.727264     | -105.820849     |
| 34      | -102.902911    | -105.410859    | -105.682914     | -104.447138     |
| 35      | -101.692603    | -103.447118    | -105.105654     | -103.969159     |
| 36      | -101.240849    | -102.835975    | -104.551344     | -103.073499     |
| 37      | -100.876607    | -101.943105    | -103.606124     | -102.162444     |
| 38      | -100.239169    |                | -103.241651     | -102.118579     |
| 39      |                |                | -101.890778     | -100.298343     |
| 40      |                |                | -101.042376     |                 |

Table 3: Energies (in  $\text{cm}^{-1}$ ) for up to 40 of the levels below  $-100 \text{ cm}^{-1}$  in each symmetry block are listed. The two left-most columns of energies are allowed states, while the two columns at right are not, but transitions involving ro-vibrational states, whose vibrational parents do not exist, are allowed (see text)

| $J = 1$ |                |                |                 |                 |
|---------|----------------|----------------|-----------------|-----------------|
|         | ee- ( $A'_2$ ) | eo- ( $B'_1$ ) | oo- ( $A''_2$ ) | oe- ( $B''_1$ ) |
| 1       | -229.334857    | -229.334766    | -229.007230     | -229.007321     |
| 2       | -207.946452    | -207.946633    | -208.262036     | -208.261865     |
| 3       | -196.076065    | -196.080437    | -187.702223     | -187.703419     |
| 4       | -188.015351    | -188.014132    | -182.500036     | -182.502237     |
| 5       | -182.833897    | -182.831717    | -175.245810     | -175.247644     |
| 6       | -169.544878    | -169.543824    | -169.877983     | -169.879110     |
| 7       | -167.341578    | -167.347307    | -167.670105     | -167.664469     |
| 8       | -166.059123    | -165.957769    | -165.597062     | -165.698357     |
| 9       | -156.726769    | -156.723604    | -157.016167     | -157.019541     |
| 10      | -155.650084    | -155.686014    | -153.848275     | -153.850462     |
| 11      | -154.196144    | -154.193819    | -148.660250     | -148.678695     |
| 12      | -152.642765    | -152.746264    | -145.492214     | -145.514764     |
| 13      | -148.994602    | -148.976061    | -141.345752     | -141.349698     |
| 14      | -145.230631    | -145.236111    | -140.326995     | -140.330592     |
| 15      | -141.682488    | -141.678468    | -139.838212     | -139.817188     |
| 16      | -139.940807    | -139.938256    | -136.614303     | -136.691346     |
| 17      | -137.881742    | -139.006677    | -135.951184     | -135.968517     |
| 18      | -136.279214    | -136.258093    | -131.969169     | -131.984367     |
| 19      | -131.633697    | -131.620363    | -130.609061     | -130.547485     |
| 20      | -130.220998    | -130.283560    | -128.615201     | -128.894517     |
| 21      | -129.243053    | -128.983064    | -128.311793     | -128.596591     |
| 22      | -128.798452    | -126.991723    | -126.658616     | -127.911349     |
| 23      | -127.049549    | -126.491100    | -126.038604     | -126.591385     |
| 24      | -125.602415    | -125.730526    | -121.626755     | -122.088704     |
| 25      | -121.291928    | -121.259839    | -118.804639     | -118.859547     |
| 26      | -119.442889    | -119.041962    | -118.412879     | -118.630361     |
| 27      | -118.783117    | -118.955488    | -117.780976     | -118.515804     |
| 28      | -118.598294    | -117.681838    | -117.380501     | -116.709229     |
| 29      | -117.581235    | -116.584478    | -115.417502     | -116.194962     |
| 30      | -117.218891    | -115.183077    | -114.755503     | -116.041567     |
| 31      | -115.244793    | -115.095181    | -114.149886     | -115.514202     |
| 32      | -114.395829    | -113.798346    | -113.718323     | -114.513029     |
| 33      | -114.088121    | -113.282469    | -112.132128     | -114.280707     |
| 34      | -113.096540    | -113.183363    | -111.853962     | -113.014379     |
| 35      | -112.245159    | -112.670015    | -111.090197     | -110.596927     |
| 36      | -111.526971    | -111.976441    | -110.698766     | -108.831739     |
| 37      | -110.208472    | -110.214894    | -107.735167     | -107.723318     |
| 38      | -108.767853    | -108.781674    | -106.490486     | -106.652308     |
| 39      | -108.279858    | -108.658143    | -105.495604     | -106.179608     |
| 40      | -107.221497    | -107.412191    | -104.687260     | -105.883127     |
